# Supplementary material for: Sortase A catalyzed reaction pathways: a comparative study with six SrtA variants
Source: Royal Society of Chemistry journal article supplement (doi:10.1039/c4cy00347k), 2014-01-01
Supplement: c4cy00347k1.pdf [file c4cy00347k1.pdf]

## **Supplementary Information**

### **Sortase A catalyzed reaction pathways: A comparative study with six SrtA variants**

Tobias Heck, Phu-Huy Pham, Alpaslan Yerlikaya, Linda Thöny-Meyer, Michael Richter\*

## Schematic representation and amino acid sequences of SrtA variants used in the present study

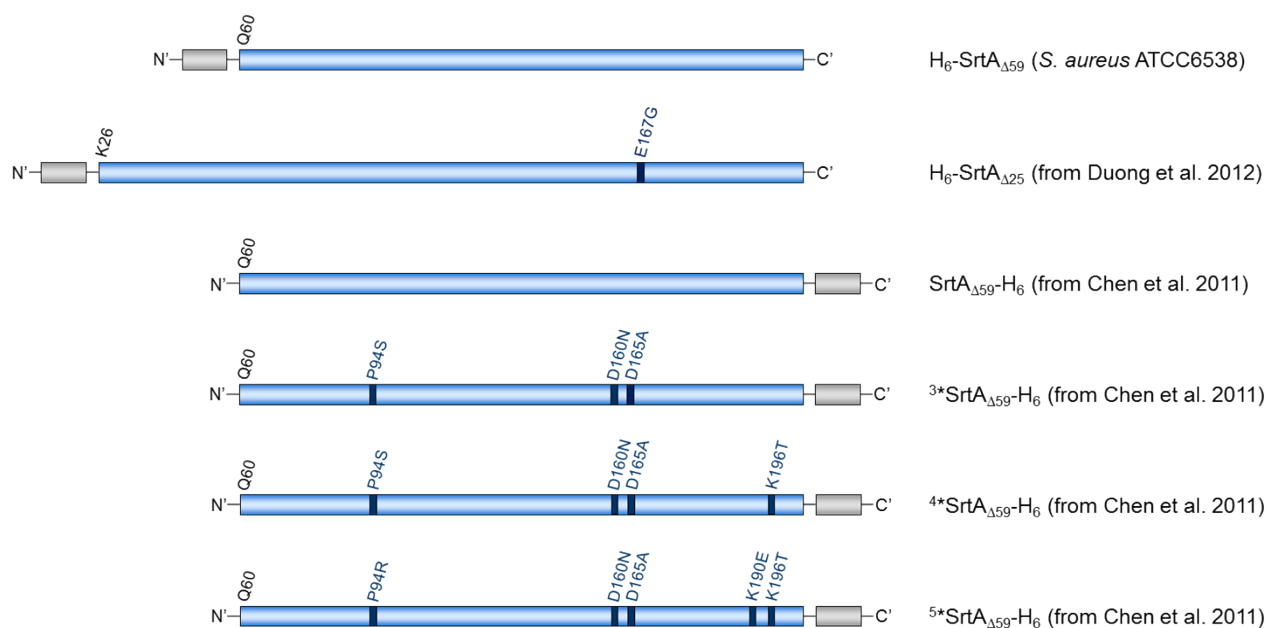

**Figure S1:** Overview of SrtA variants used in the present study. Amino acid changes relative to the standard SrtA from *S. aureus* ATCC6538 are indicated in dark blue. Hexahistidine tags added for purification of the proteins by IMAC are represented by grey boxes.

### Amino acid sequences of SrtA variants

H<sub>6</sub>-SrtA<sub>Δ59</sub> (159 amino acids; MW: 18.1 kDa;  $\epsilon_{280} = 14440 \text{ M}^{-1}\text{cm}^{-1}$ ):

MRGSHHHHHHGSQAKPQIPKDKSKVAGYIEIPDADIKEPVYPGPATPEQLNRGVSF AEENES  
LDDQNISIAGHTFIDRPNYQFTNLKAAKKGSMVYFKVGNETRKYKMTSIRDVKPTDVEVLD  
EQKGKDKQLTLITCDDYNEKTGVWEKRKIFVATEVK

H<sub>6</sub>-SrtA<sub>Δ25</sub> (202 amino acids; MW: 23.0 kDa;  $\epsilon_{280} = 17420 \text{ M}^{-1}\text{cm}^{-1}$ ):

MGSSHHHHHHSSGLVPRGSHMKPHIDNYLHDKDKDEKIEQYDKNVKEQASKDKKQQA  
KPKDKSKVAGYIEIPDADIKEPVYPGPATPEQLNRGVSF AEENESLDDQNISIAGHTFIDRP  
NYQFTNLKAAKKGSMVYFKVGNETRKYKMTSIRDVKPTDVGVLDEQKGKDKQLTLITCDDY  
NEKTGVWEKRKIFVATEVK

SrtA<sub>Δ59</sub>-H<sub>6</sub> (156 amino acids; MW: 17.9 kDa;  $\epsilon_{280} = 14440 \text{ M}^{-1}\text{cm}^{-1}$ ):

MQAQKPQIPKDKSKVAGYIEIPDADIKEPVYPGPATPEQLNRGVSF AEENESLDDQNISIAGHT

FIDRPNYQFTNLKAAKKGSMVYFKVGNETRKYKMTSIRDVKPTDVEVLDEQKGKDKQLTLI  
TCDDYNEKTGVWEKRKIFVATEVKLEHHHHHHH

<sup>3</sup>\*SrtA<sub>Δ59</sub>-H<sub>6</sub> (156 amino acids; MW: 17.8 kDa;  $\epsilon_{280}$ = 14440 M<sup>-1</sup>cm<sup>-1</sup>):

MQAKPQIPKDKSKVAGYIEIPDADIKEPVYPGPATSEQLNRGVSF AEENESLDDQNISIAGHT  
FIDRPNYQFTNLKAAKKGSMVYFKVGNETRKYKMTSIRNVKPTAVEVLDEQKGKDKQLTLI  
TCDDYNEKTGVWEKRKIFVATEVKLEHHHHHHH

<sup>4</sup>\*SrtA<sub>Δ59</sub>-H<sub>6</sub> (156 amino acids; MW: 17.8 kDa;  $\epsilon_{280}$ = 14440 M<sup>-1</sup>cm<sup>-1</sup>):

MQAKPQIPKDKSKVAGYIEIPDADIKEPVYPGPATSEQLNRGVSF AEENESLDDQNISIAGHT  
FIDRPNYQFTNLKAAKKGSMVYFKVGNETRKYKMTSIRNVKPTAVEVLDEQKGKDKQLTLI  
TCDDYNEKTGVWETRKIFVATEVKLEHHHHHHH

<sup>5</sup>\*SrtA<sub>Δ59</sub>-H<sub>6</sub> (156 amino acids; MW: 17.9 kDa;  $\epsilon_{280}$ = 14440 M<sup>-1</sup>cm<sup>-1</sup>):

MQAKPQIPKDKSKVAGYIEIPDADIKEPVYPGPATREQLNRGVSF AEENESLDDQNISIAGHT  
FIDRPNYQFTNLKAAKKGSMVYFKVGNETRKYKMTSIRNVKPTAVEVLDEQKGKDKQLTLI  
TCDDYNEETGVWETRKIFVATEVKLEHHHHHHH

## Schematic representation and amino acid sequences of target protein variants used in the present study

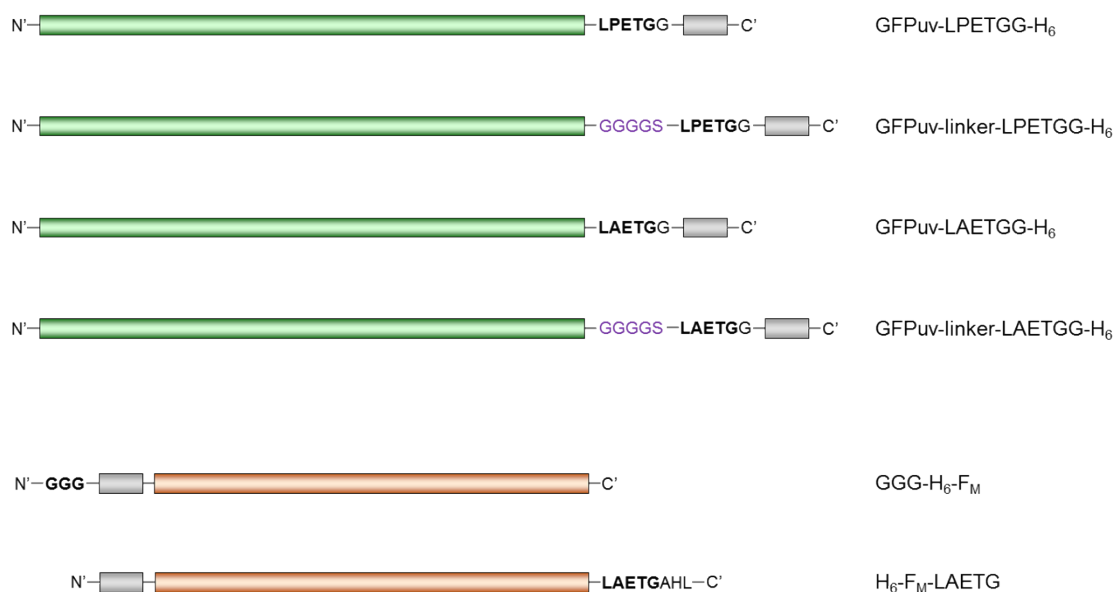

**Figure S2:** Overview of GFPuv variants and oligoglycine-modified F<sub>M</sub> protein used as substrates for SrtA-catalyzed coupling reactions. Hexahistidine tags added for purification of the proteins by IMAC are represented by grey boxes.

### Amino acid sequences of target protein variants

GFPuv-LPETGG-H<sub>6</sub> (250 amino acids; MW (non-mature): 28.2 kDa;  $\epsilon_{280} = 21890 \text{ M}^{-1}\text{cm}^{-1}$ ):

MSKGEELFTGVVPILVELDGDVNGHKFSVSGEGEGDATYGKLTCLKFICTTGKLPVPWPTLVT  
TFSYGVQCFSRYPDHMKRHDFFKSAMPEGYVQERTISFKDDGNYKTRAEVKFEGDTLVNRI  
ELKGIDFKEDGNILGHKLEYNYNSHNVYITADKQKNGIKANFKIRHNIEDGSVQLADHYQQ  
NTPIGDGPVLLPDNHYLSTQSALS KDPNEKRDHMLLEFVTAAGITHGMDELYKLPETGGH  
HHHHH

GFPuv-LAETGG-H<sub>6</sub> (250 amino acids; MW (non-mature): 28.1 kDa;  $\epsilon_{280} = 21890 \text{ M}^{-1}\text{cm}^{-1}$ ):

MSKGEELFTGVVPILVELDGDVNGHKFSVSGEGEGDATYGKLTCLKFICTTGKLPVPWPTLVT  
TFSYGVQCFSRYPDHMKRHDFFKSAMPEGYVQERTISFKDDGNYKTRAEVKFEGDTLVNRI  
ELKGIDFKEDGNILGHKLEYNYNSHNVYITADKQKNGIKANFKIRHNIEDGSVQLADHYQQ  
NTPIGDGPVLLPDNHYLSTQSALS KDPNEKRDHMLLEFVTAAGITHGMDELYKLAETGGH  
HHHHH

GFPuv-linker-LPETGG-H<sub>6</sub> (255 amino acids; MW (non-mature): 28.5 kDa;  $\epsilon_{280}$ = 21890 M<sup>-1</sup>cm<sup>-1</sup>):  
MSKGEELFTGVVPILVELDGDVNGHKFSVSGEGEGDATYGKLTCLKFICTTGKLPVPWPTLVT  
TFSYGVQCFSRYPDHMKRHDFFKSAMPEGYVQERTISFKDDGNYKTRAEVKFEGDTLVNRI  
ELKGIDFKEDGNILGHKLEYNYNSHNVYITADKQKNGIKANFKIRHNIEDGSVQLADHYQQ  
NTPIGDGPVLLPDNHYLSTQSALS KDPNEKRDMVLLFVTAAGITHGMDELYKGGGGSLP  
ETGGHHHHHH

GFPuv-linker-LAETGG-H<sub>6</sub> (255 amino acids; MW (non-mature): 28.5 kDa;  $\epsilon_{280}$ = 21890 M<sup>-1</sup>cm<sup>-1</sup>):  
MSKGEELFTGVVPILVELDGDVNGHKFSVSGEGEGDATYGKLTCLKFICTTGKLPVPWPTLVT  
TFSYGVQCFSRYPDHMKRHDFFKSAMPEGYVQERTISFKDDGNYKTRAEVKFEGDTLVNRI  
ELKGIDFKEDGNILGHKLEYNYNSHNVYITADKQKNGIKANFKIRHNIEDGSVQLADHYQQ  
NTPIGDGPVLLPDNHYLSTQSALS KDPNEKRDMVLLFVTAAGITHGMDELYKGGGGSLA  
ETGGHHHHHH

GGG-H<sub>6</sub>-F<sub>M</sub> (132 amino acids; MW: 14.7 kDa;  $\epsilon_{280}$ = 14440 M<sup>-1</sup>cm<sup>-1</sup>):  
MGGGHHHHHHYPYDVPDYAAMA EFMGVQVETISPGDGRTFPKRGQTCVVHYTGMLEDG  
KKMDSSRDRNKP FKFMLGKQEVIRGWEEGVAQMSVGQRAKLTISPDYAYGATGHPIPPH  
ATLVFDVELLKLE

H<sub>6</sub>-F<sub>M</sub>-LAETG (137 amino acids; MW: 15.3 kDa;  $\epsilon_{280}$ = 14440 M<sup>-1</sup>cm<sup>-1</sup>):  
MHHHHHHYPYDVPDYAAMA EFMGVQVETISPGDGRTFPKRGQTCVVHYTGMLEDGKKM  
DSSRDRNKP FKFMLGKQEVIRGWEEGVAQMSVGQRAKLTISPDYAYGATGHPIPPHATL  
VFDVELLKLELAETGAHL

## SDS-PAGE gels of SrtA catalyzed reactions

H<sub>6</sub>-SrtA<sub>Δ59</sub> (18.1 kDa):

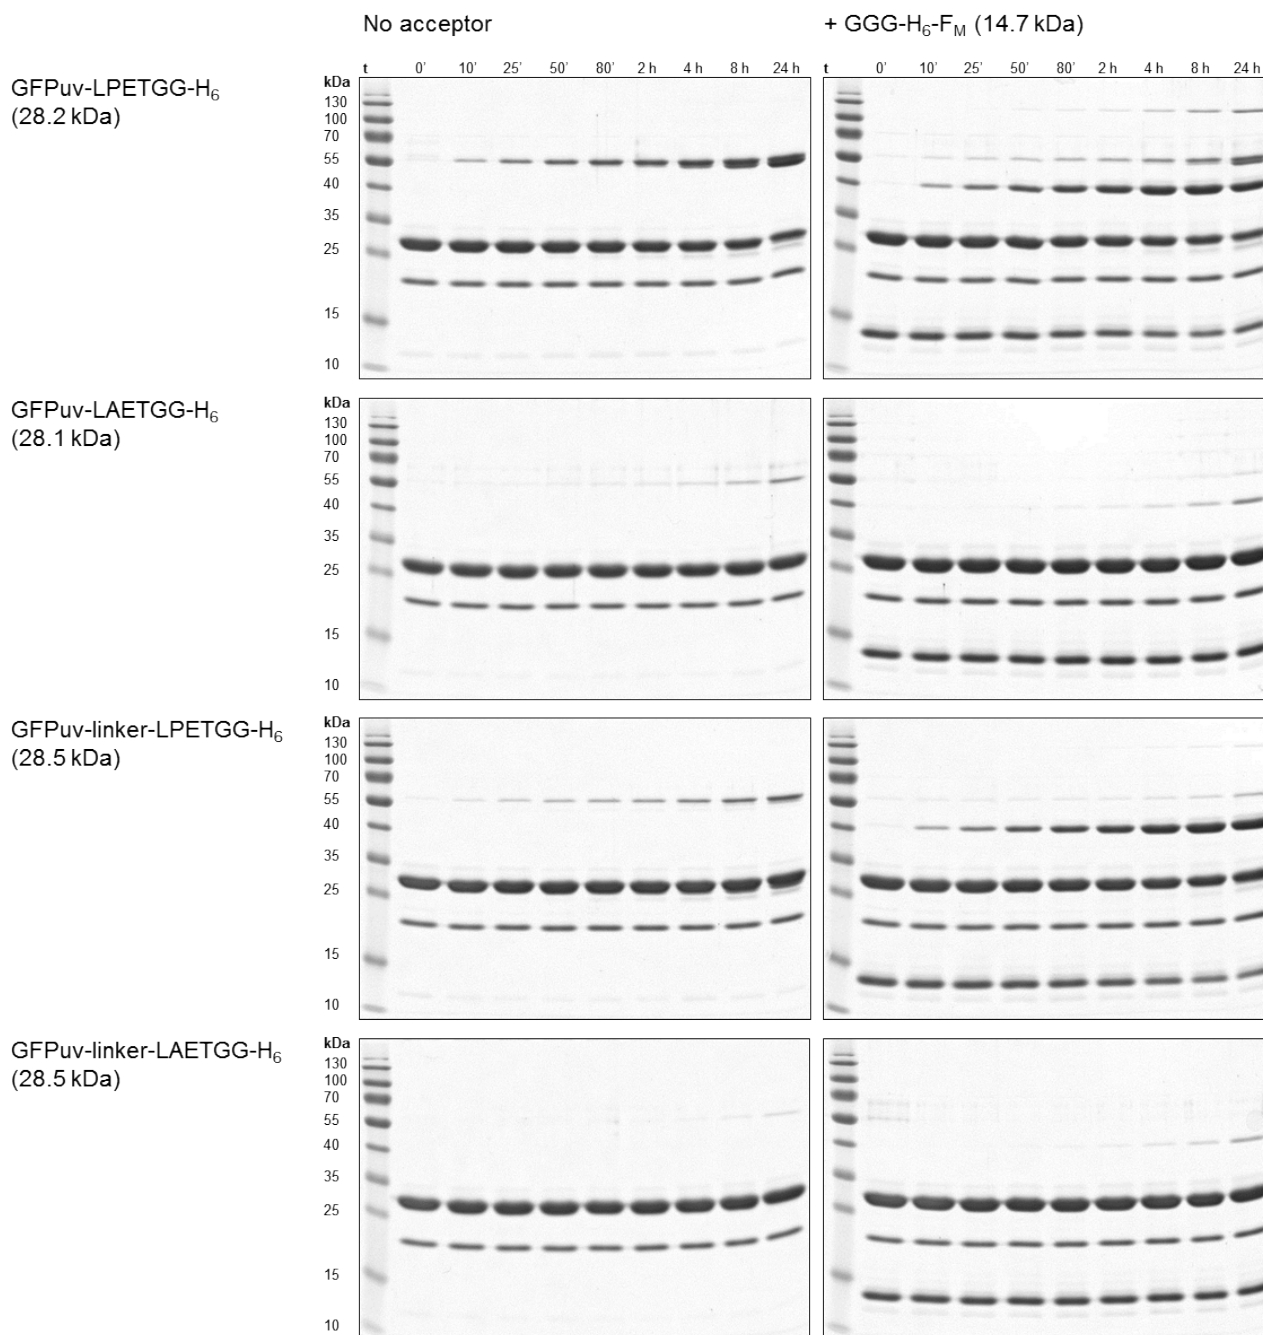

**Figure S3a:** Left: Reactions of GFPuv target proteins (10  $\mu$ M) catalyzed by H<sub>6</sub>-SrtA<sub>Δ59</sub> (2  $\mu$ M). Right: Reactions of GFPuv target proteins (10  $\mu$ M) and the acceptor protein GGG-H<sub>6</sub>-F<sub>M</sub> (10  $\mu$ M) catalyzed by H<sub>6</sub>-SrtA<sub>Δ59</sub> (2  $\mu$ M).

H<sub>6</sub>-SrtA<sub>Δ25</sub> (23.0 kDa):

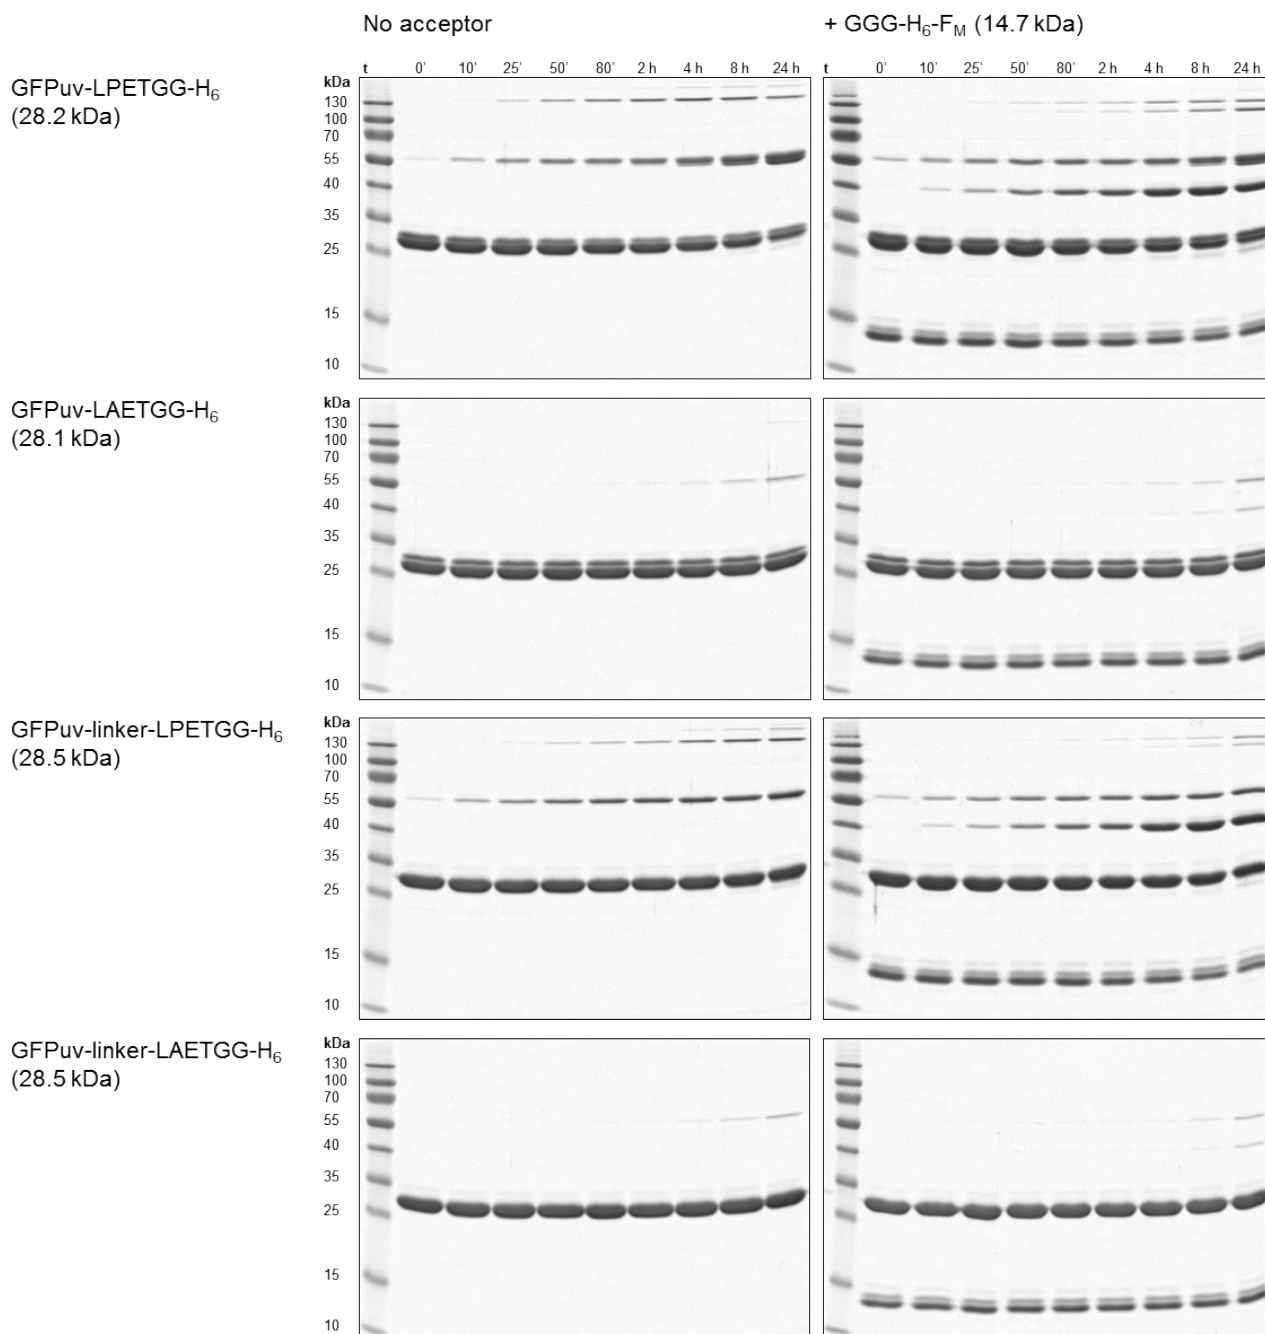

**Figure S3b:** Left: Reactions of GFPuv target proteins (10  $\mu$ M) catalyzed by H<sub>6</sub>-SrtA<sub>Δ25</sub> (2  $\mu$ M). Right: Reactions of GFPuv target proteins (10  $\mu$ M) and the acceptor protein GGG-H<sub>6</sub>-F<sub>M</sub> (10  $\mu$ M) catalyzed by H<sub>6</sub>-SrtA<sub>Δ25</sub> (2  $\mu$ M).

SrtA<sub>Δ59</sub>-H<sub>6</sub> (17.9 kDa):

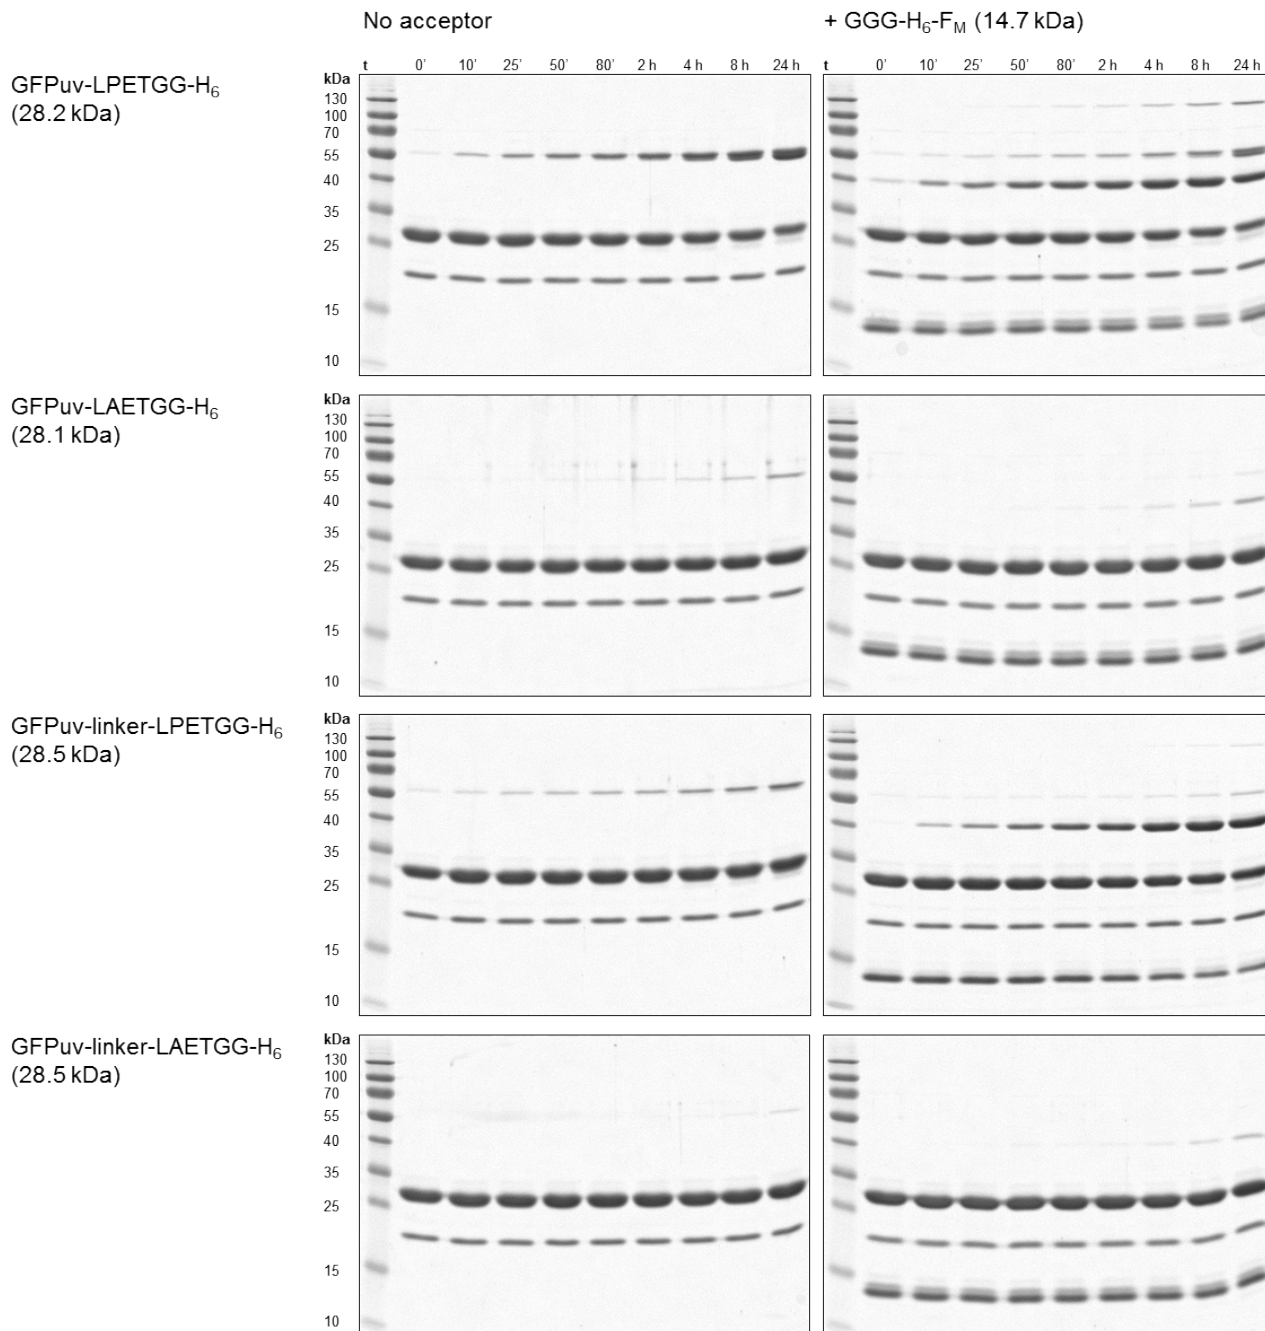

**Figure S3c:** Left: Reactions of GFPuv target proteins (10  $\mu$ M) catalyzed by SrtA<sub>Δ59</sub>-H<sub>6</sub> (2  $\mu$ M). Right: Reactions of GFPuv target proteins (10  $\mu$ M) and the acceptor protein GGG-H<sub>6</sub>-F<sub>M</sub> (10  $\mu$ M) catalyzed by SrtA<sub>Δ59</sub>-H<sub>6</sub> (2  $\mu$ M).



$^3\text{SrtA}_{\Delta 59}\text{-H}_6$  (17.8 kDa):

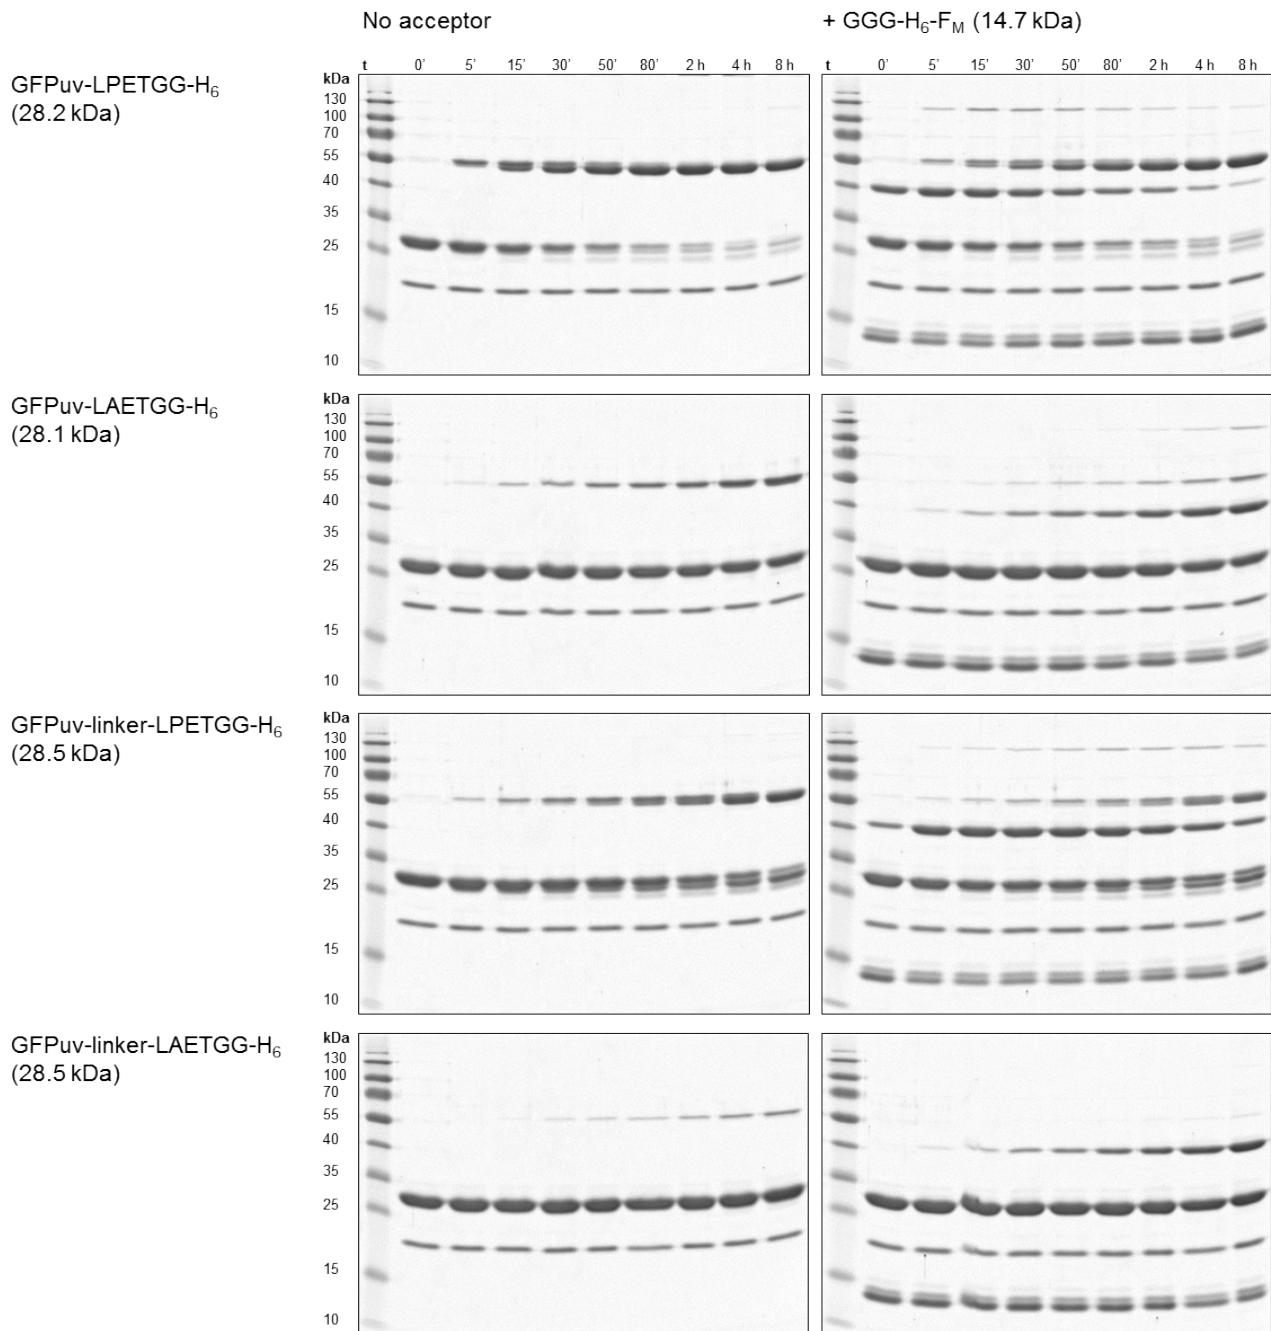

**Figure S3d:** Left: Reactions of GFPuv target proteins (10  $\mu\text{M}$ ) catalyzed by  $^3\text{SrtA}_{\Delta 59}\text{-H}_6$  (2  $\mu\text{M}$ ). Right: Reactions of GFPuv target proteins (10  $\mu\text{M}$ ) and the acceptor protein GGG-H<sub>6</sub>-F<sub>M</sub> (10  $\mu\text{M}$ ) catalyzed by  $^3\text{SrtA}_{\Delta 59}\text{-H}_6$  (2  $\mu\text{M}$ ).

$^4\text{SrtA}_{\Delta 59}\text{-H}_6$  (17.8 kDa):

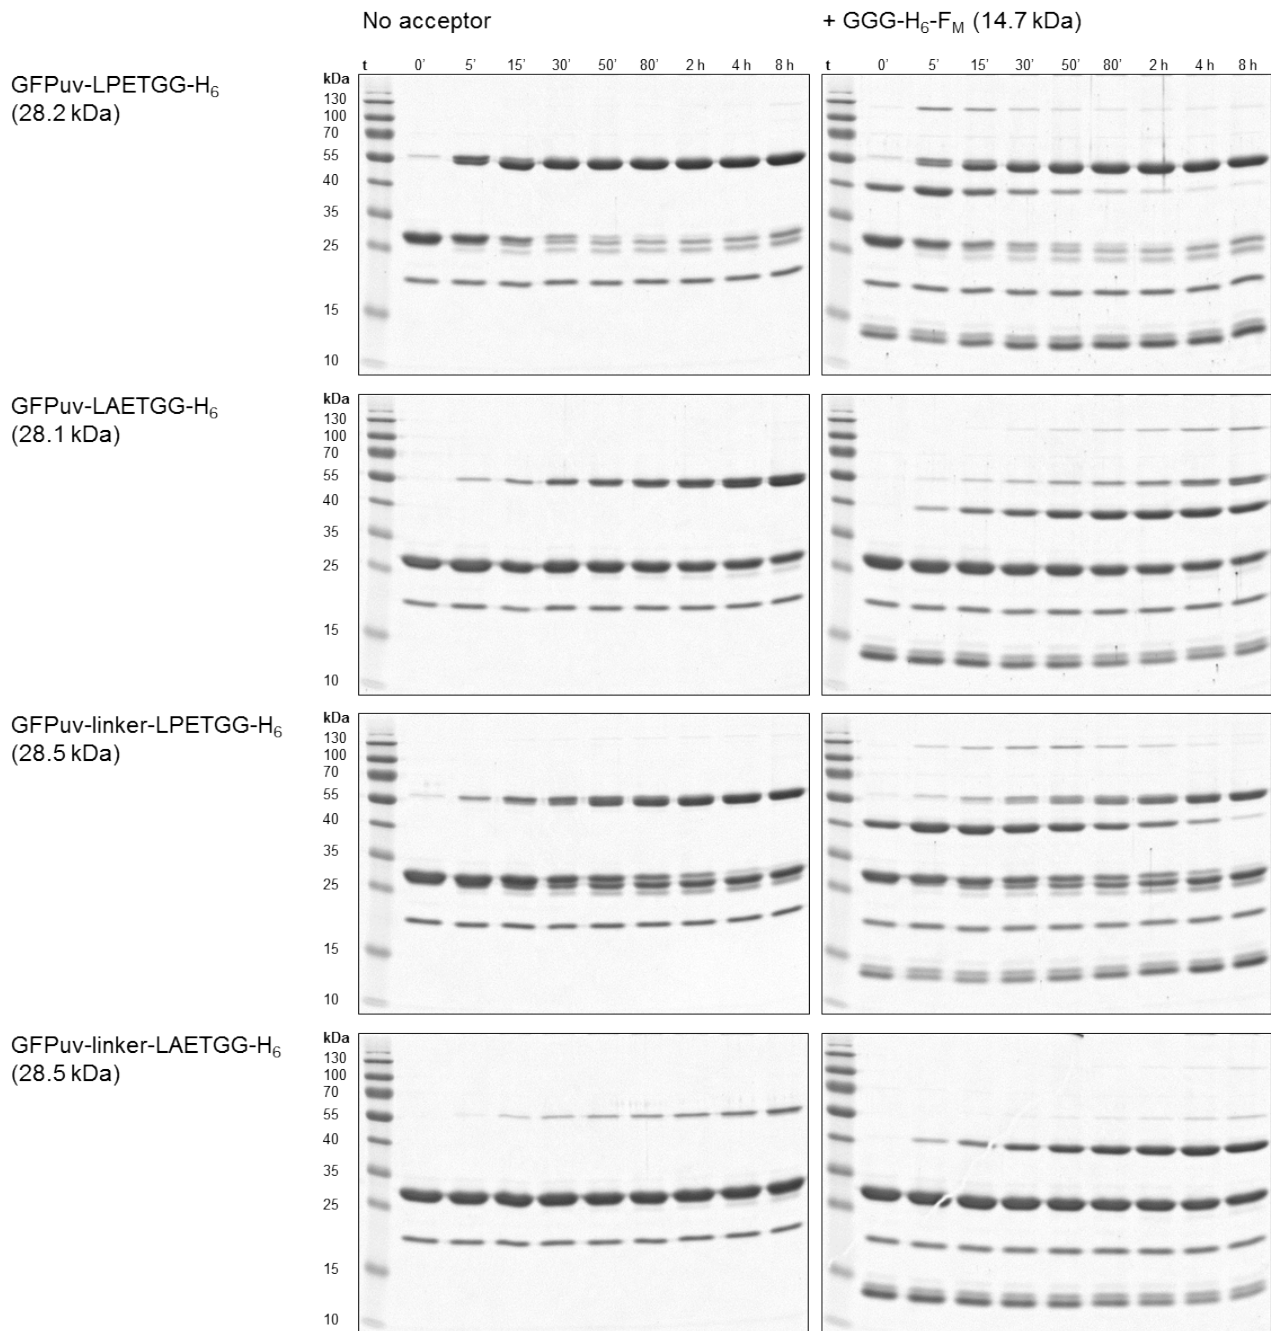

**Figure S3e:** Left: Reactions of GFPuv target proteins (10  $\mu\text{M}$ ) catalyzed by  $^4\text{SrtA}_{\Delta 59}\text{-H}_6$  (2  $\mu\text{M}$ ). Right: Reactions of GFPuv target proteins (10  $\mu\text{M}$ ) and the acceptor protein GGG-H<sub>6</sub>-F<sub>M</sub> (10  $\mu\text{M}$ ) catalyzed by  $^4\text{SrtA}_{\Delta 59}\text{-H}_6$  (2  $\mu\text{M}$ ).

$5^*$ SrtA $_{\Delta 59}$ -H $_6$  (17.9 kDa):

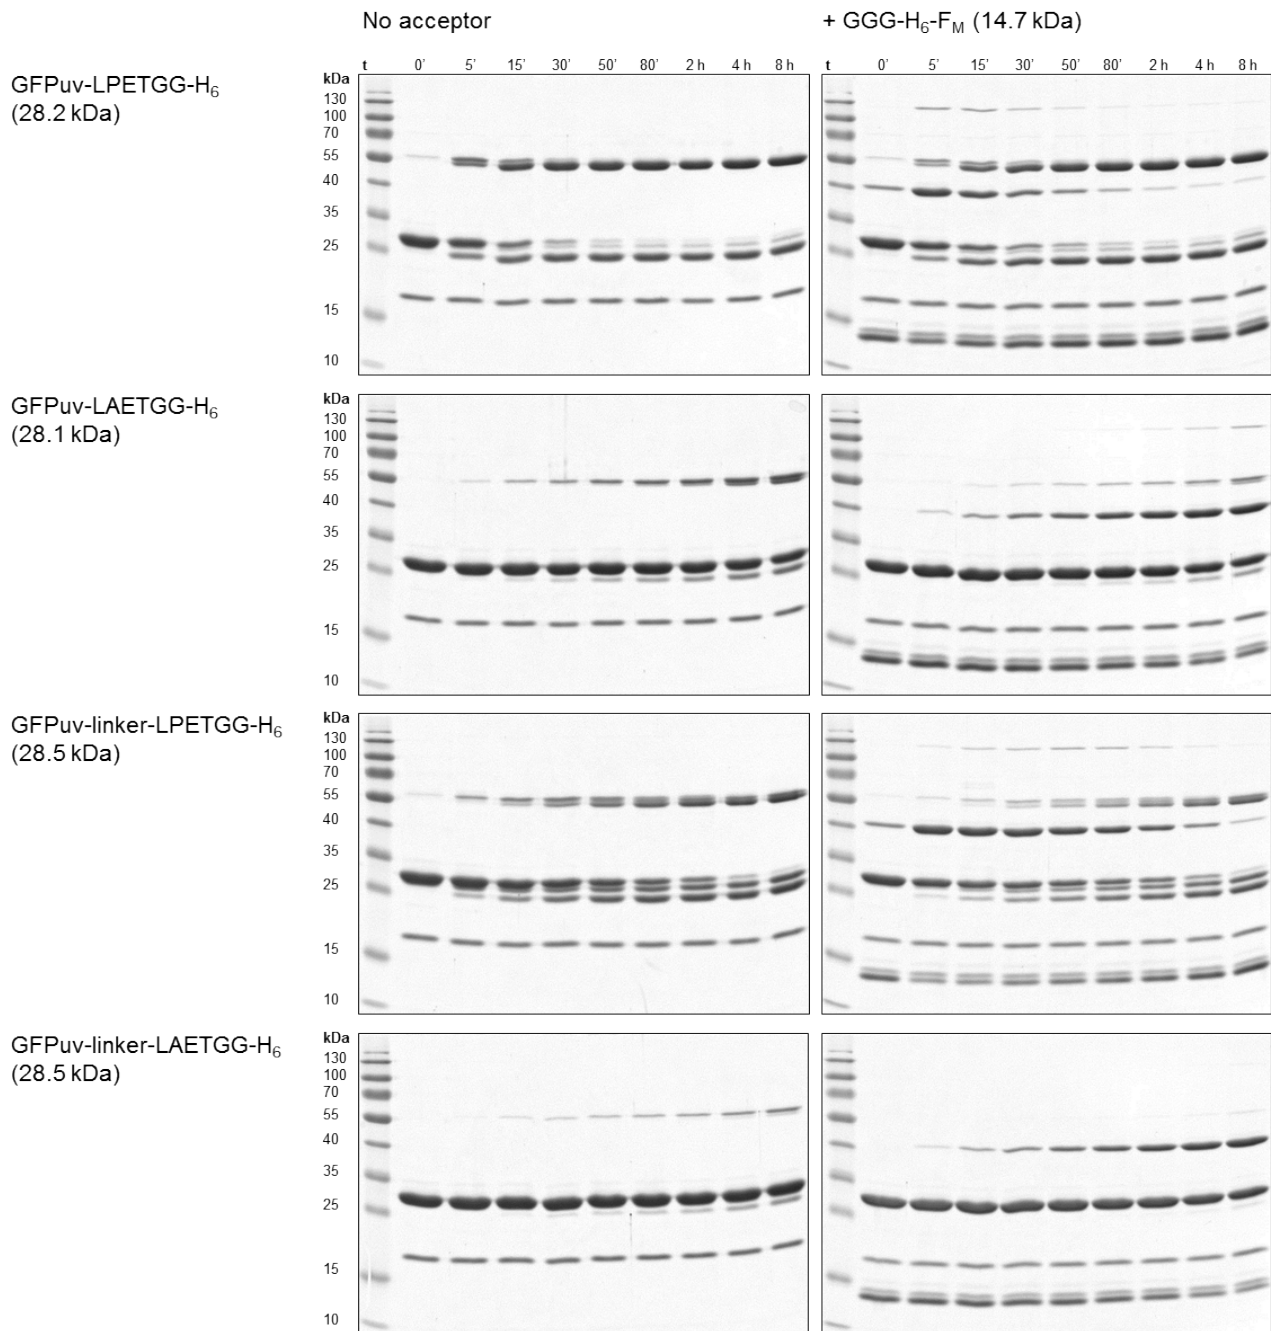

**Figure S3f:** Left: Reactions of GFPuv target proteins (10  $\mu$ M) catalyzed by  $5^*$ SrtA $_{\Delta 59}$ -H $_6$  (2  $\mu$ M). Right: Reactions of GFPuv target proteins (10  $\mu$ M) and the acceptor protein GGG-H $_6$ -F $_M$  (10  $\mu$ M) catalyzed by  $5^*$ SrtA $_{\Delta 59}$ -H $_6$  (2  $\mu$ M).

## Evaluation of SDS-PAGE gels (see Suppl. Figures S3a-f)

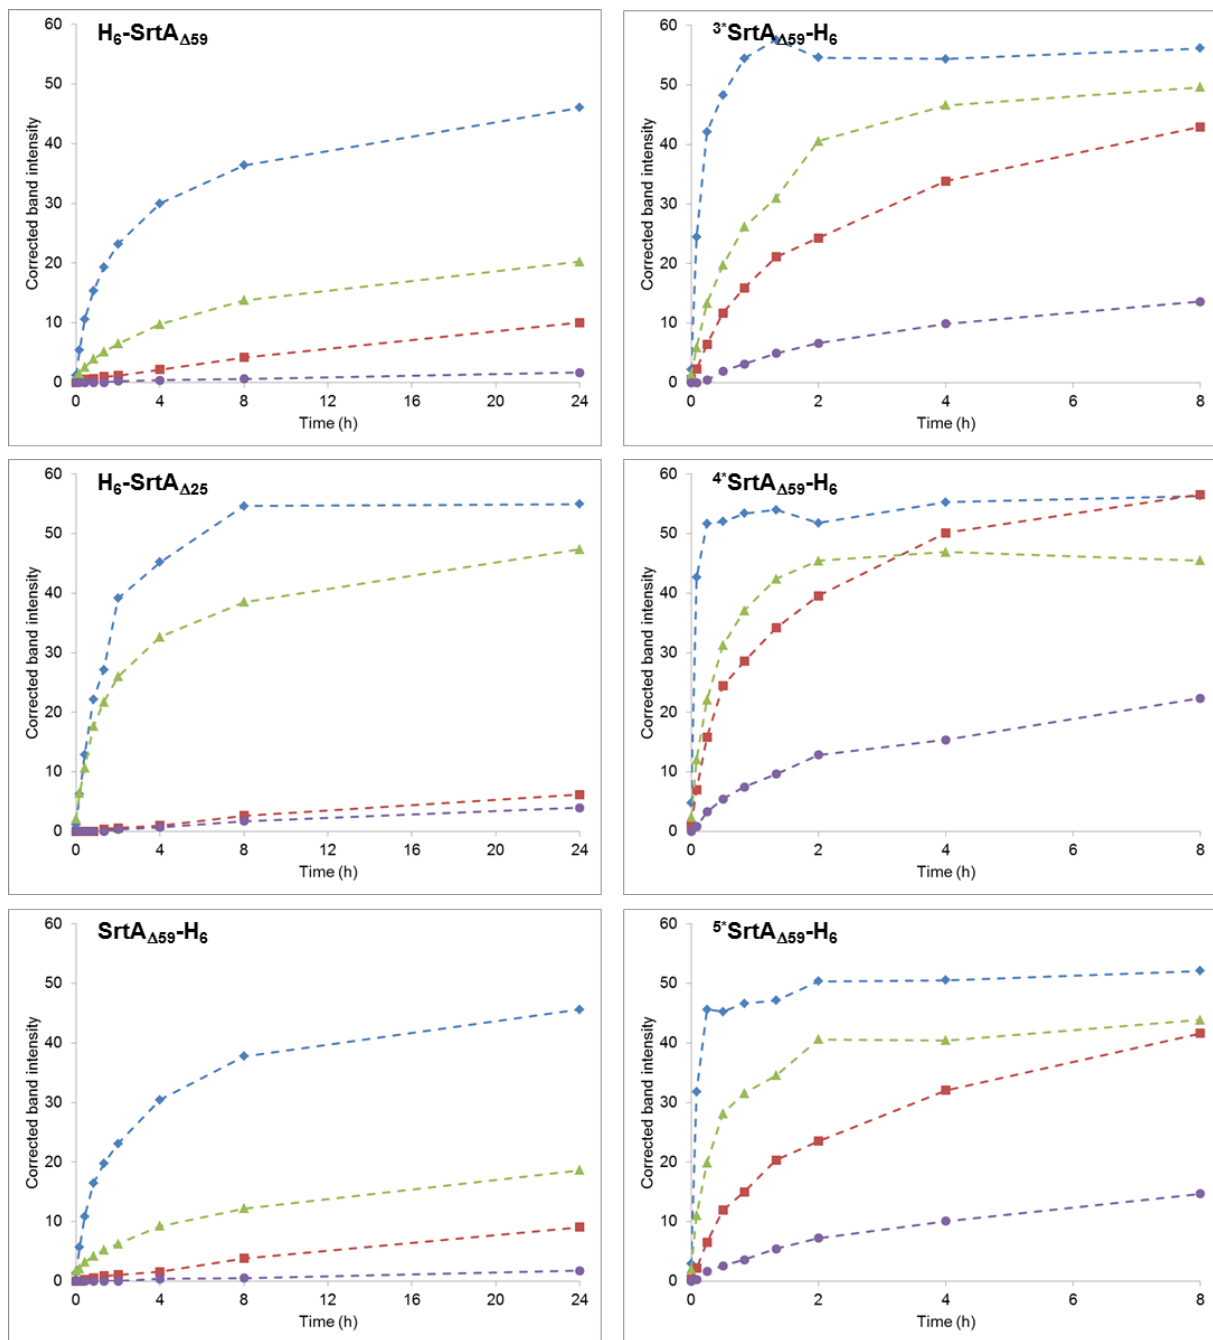

**Figure S4a:** Intermolecular crosslinking of the GFPuv target proteins GFPuv-LPETGG-H<sub>6</sub> (blue), GFPuv-LAETGG-H<sub>6</sub> (red), GFPuv-linker-LPETGG-H<sub>6</sub> (green) and GFPuv-linker-LAETGG-H<sub>6</sub> (purple) by SrtA variants. Band intensities of crosslinked protein species were obtained by digital image analysis of the respective SDS-PAGE gels (Suppl. Figures S3a-f, left column) and corrected for the band intensity and the molecular weight of the employed SrtA variant as described in the experimental section.

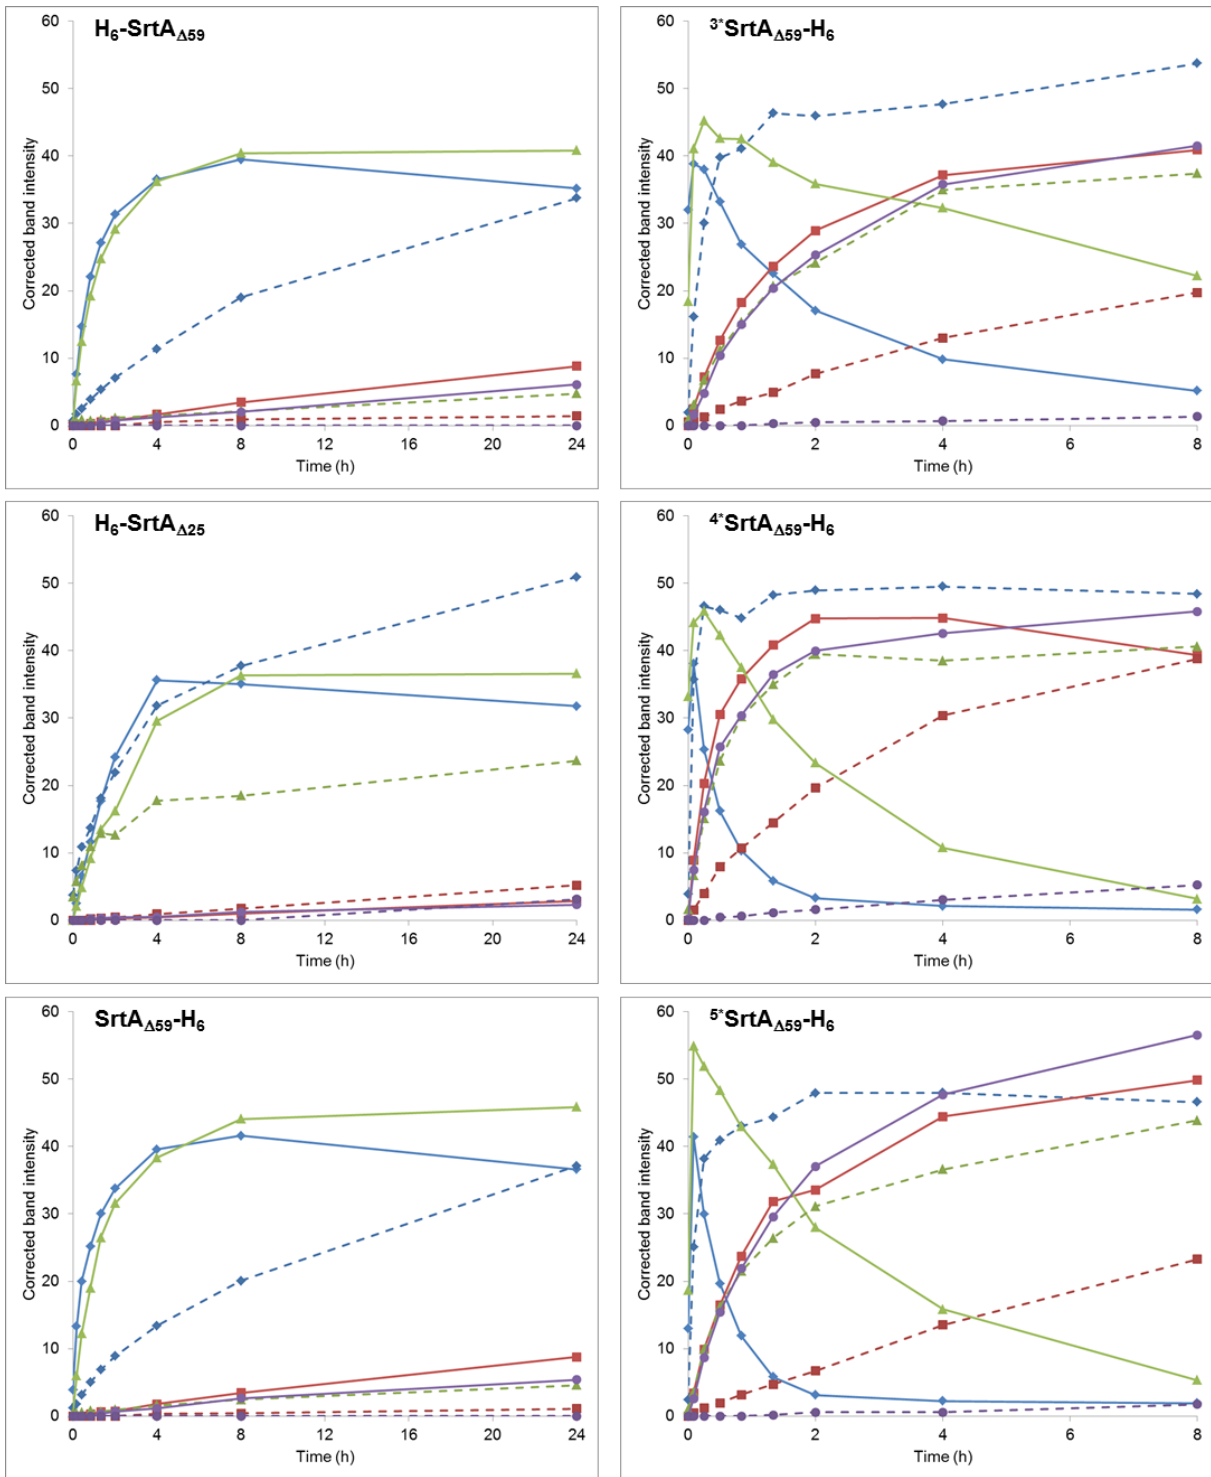

**Figure S4b:** Transpeptidation reactions between the GFPuv target proteins GFPuv-LPETGG-H<sub>6</sub> (blue), GFPuv-LAETGG-H<sub>6</sub> (red), GFPuv-linker-LPETGG-H<sub>6</sub> (green), GFPuv-linker-LAETGG-H<sub>6</sub> (purple) and the acceptor protein GGG-H<sub>6</sub>-F<sub>M</sub> (GFPuv-F<sub>M</sub> product: solid lines). Byproducts, *i.e.* crosslinked homodimeric and -oligomeric species of GFPuv are depicted as dashed lines. Band intensities of the formed protein species were obtained by digital image analysis of the respective SDS-PAGE gels (Suppl. Figures S3a-f, right columns) and corrected for the band intensity and the molecular weight of the employed SrtA variant as described in the experimental section.
